# Supplementary material for: Electrosynthesis of NH3 from N2 using nanostructured Bi4Ti3O12 catalyst
Source: Royal Society of Chemistry journal article supplement (doi:10.1039/d4se01040j), 2024-01-01
Supplement: d4se01040j1.pdf [file d4se01040j1.pdf]

## Supporting Information

### Electrosynthesis of NH<sub>3</sub> from N<sub>2</sub> using nanostructured Bi<sub>4</sub>Ti<sub>3</sub>O<sub>12</sub> catalyst

Meera Sebastian<sup>a,c</sup>, Subrata Das<sup>b,c</sup>, Nishanth Karimbintherikkal Gopalan<sup>a,c,\*</sup>

<sup>a</sup>Centre for Sustainable Energy Technologies(C-SET), CSIR-National Institute for Interdisciplinary Science and Technology (NIIST), Thiruvananthapuram 695019, India.

<sup>b</sup>Material Sciences and Technologies Division, CSIR-National Institute for Interdisciplinary Science and Technology (NIIST), Thiruvananthapuram 695019, India.

<sup>c</sup>Academy of Scientific and Innovative Research (AcSIR), Ghaziabad 201002, India.

\*Corresponding author. Tel.: +91471 2515508; Fax: +91471 2491712

E-mail address: [nishanthkg@niist.res.in](mailto:nishanthkg@niist.res.in)

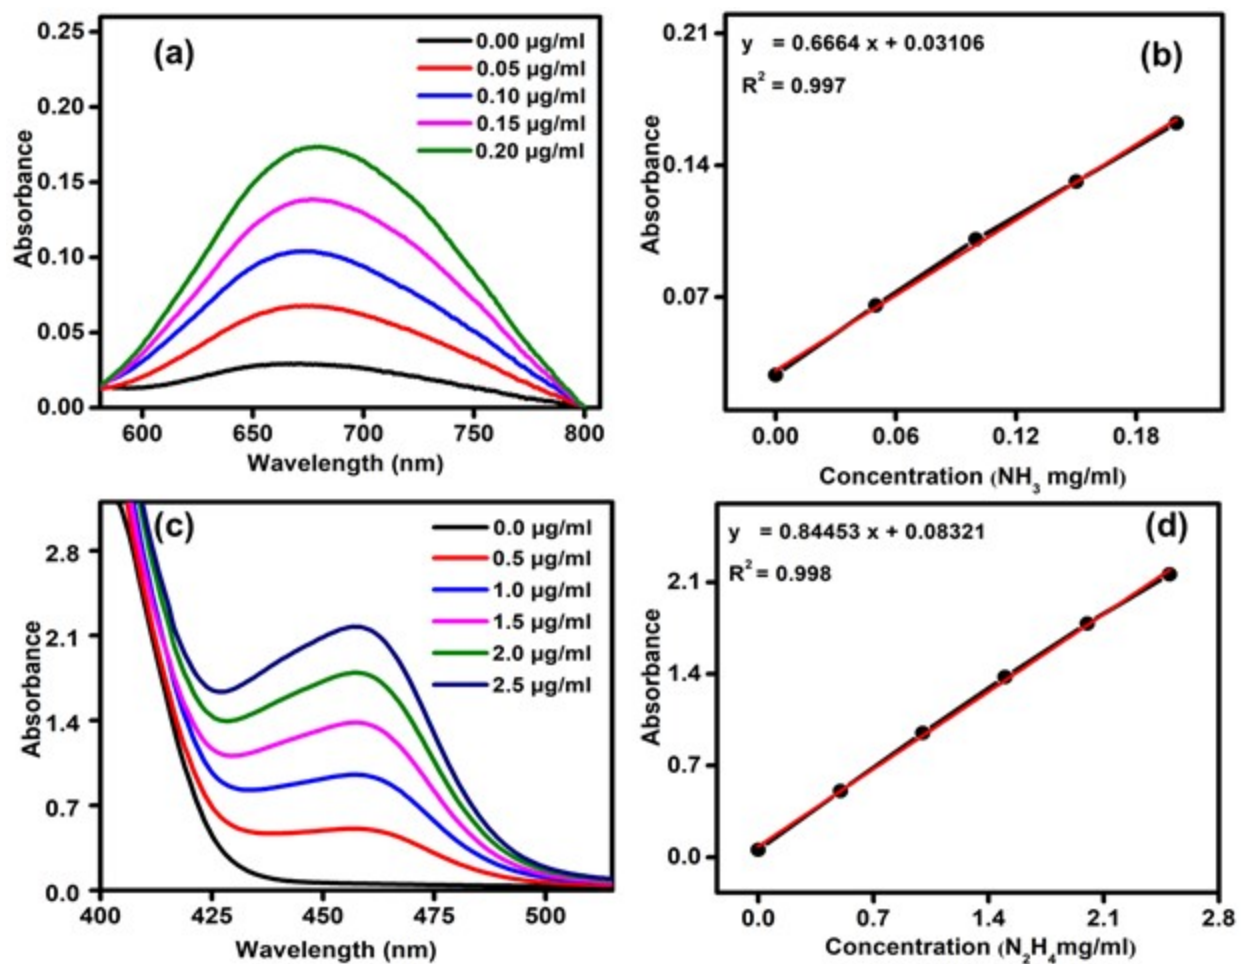

Fig. S1 (a) UV-Vis absorption spectra of various known concentrations of  $\text{NH}_3$  and (b) calibration curve to find out the  $\text{NH}_3$  concentrations. (c) UV-Vis absorption spectra of different known concentrations of  $\text{N}_2\text{H}_4$  and (d) associated calibration curve to analyze the  $\text{N}_2\text{H}_4$  concentrations

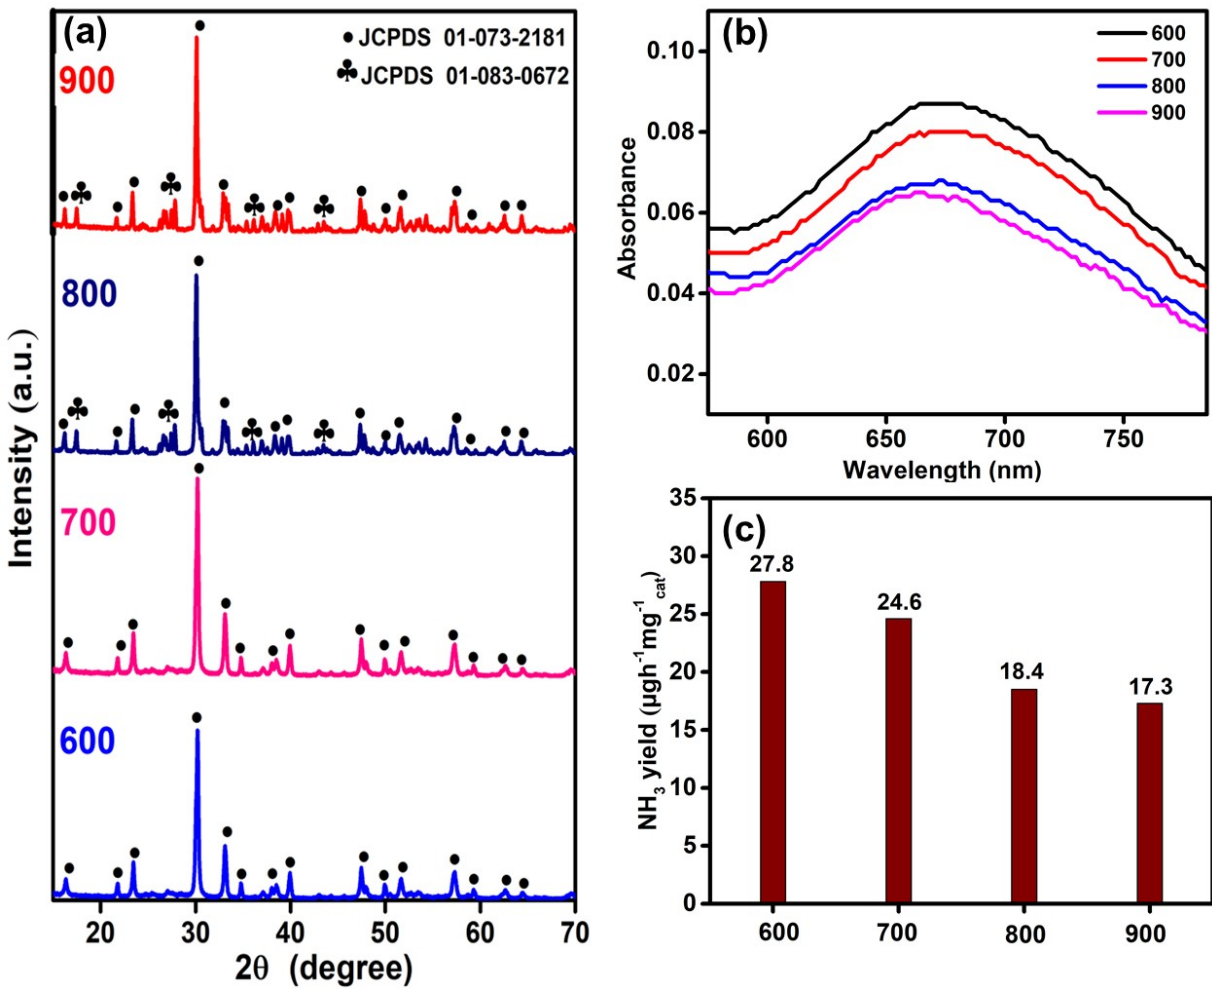

Fig. S2 (a)XRD analysis, (b) UV-Vis absorption spectra and (c) corresponding NRR yield obtained for the catalyst calcined at different temperatures

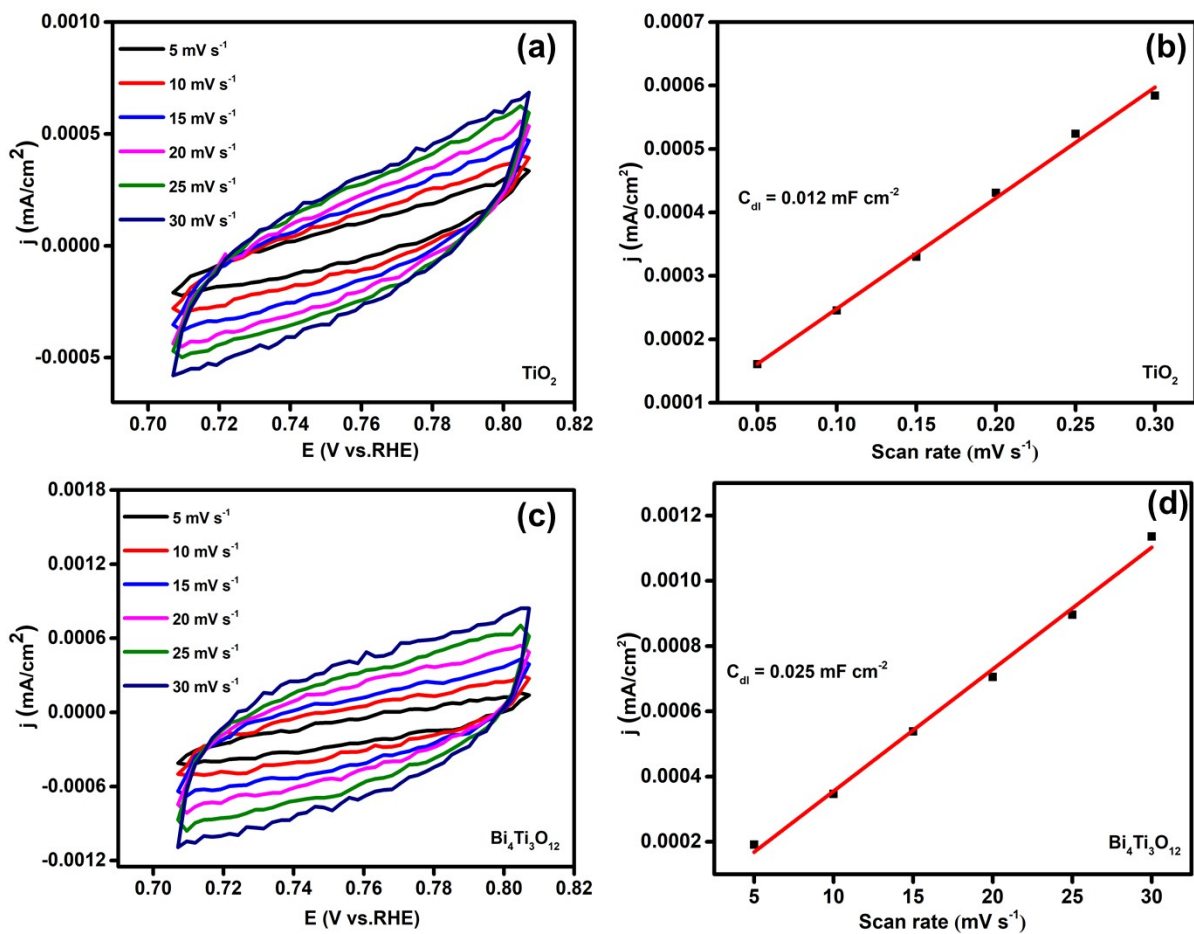

Fig. S3 Electrochemical double-layer capacitance ( $C_{dl}$ ) measurements with different scanning rates of 5~30  $\text{mV s}^{-1}$  for  $\text{TiO}_2$  (a,b) and  $\text{Bi}_4\text{Ti}_3\text{O}_{12}$  (c,d).
